# Supplementary material for: A Systematic Review of Renal Pathology in Chronic Kidney Disease of Uncertain Etiology
Source: PubMed Central journal article supplement — Kidney Int Rep. 2021 Apr 20;6(6):1711–28. doi: 10.1016/j.ekir.2021.03.898 (PMC8207327; doi:10.1016/j.ekir.2021.03.898), 2021-04-20
Supplement: mmc1.pdf [file mmc1.pdf]

## Online Supplementary Material

### A SYSTEMATIC REVIEW OF RENAL PATHOLOGY IN CHRONIC KIDNEY DISEASE OF UNCERTAIN ETIOLOGY

Item S1 – Supplementary Table S1: Characteristics of studies

Item S2 – Prisma Checklist

#### Item S1

#### Supplementary Table S1: Characteristics of the studies

| Study Country & Number of biopsies                                              | Aim of the study                                                                                      | Study period | Patients selected from                                | Study design                                                                | Case selection criteria                                                                                               | Inclusion criteria                                                                                                                       | Exclusion criteria                                                                            |
|---------------------------------------------------------------------------------|-------------------------------------------------------------------------------------------------------|--------------|-------------------------------------------------------|-----------------------------------------------------------------------------|-----------------------------------------------------------------------------------------------------------------------|------------------------------------------------------------------------------------------------------------------------------------------|-----------------------------------------------------------------------------------------------|
| <b>Sri Lanka</b>                                                                |                                                                                                       |              |                                                       |                                                                             |                                                                                                                       |                                                                                                                                          |                                                                                               |
| <b>Athuraliya et al. 2011<sup>26</sup></b><br><b>SL cohort;</b><br><b>n=26</b>  | Population survey to study epidemiology of CKDu                                                       | 2003         | Medawachchiya, Anuradhapura                           | Population survey with community-based screening<br>Random Cluster Sampling | Proteinuric-CKD patients with no definitive aetiology identified through household screening and referred for biopsy. | Presence of persistent proteinuria, $\geq+1$ ( $\geq 30$ mg/dl), detected by dipstick in a spot urine sample.                            |                                                                                               |
| <b>Nanayakkara et al. 2012<sup>27</sup></b><br><b>SL cohort;</b><br><b>n=57</b> | To describe the histopathological features of CKDu with the objective of finding possible pathogen/s. | 2008-2009    | General Hospital, Anuradhapura                        | Cross sectional descriptive study                                           | Clinically diagnosed CKDu patients undergoing renal biopsy :                                                          |                                                                                                                                          | Diabetes, malignant hypertension, urological disease, SLE, IgA nephropathy                    |
| <b>Wijetunge et al. 2013<sup>28</sup></b><br><b>SL cohort;</b><br><b>n=211</b>  | To study the early histopathological changes in CKDu and                                              | 2007-2010    | Patients referred for biopsy at tertiary hospitals of | Retrospective analysis of biopsy samples                                    | Asymptomatic individuals living in CKDu endemic regions for more than 5 years, detected to have CKD on screening      | Positive albuminuria $\geq+1$ and proteinuria $>500$ mg/24 hrs, or proteinuria $<500$ mg/24 hrs with haematuria, or renal insufficiency. | Diabetes, long standing hypertension, end stage renal failure, IMF positive lesions on biopsy |

|                                                                                                                  |                                                                                                                                                |               |                                                                                                                                                                                                  |                                           |                                                                                                                                                    |                                                                                                                                                            |                                                                                                                                                                     |
|------------------------------------------------------------------------------------------------------------------|------------------------------------------------------------------------------------------------------------------------------------------------|---------------|--------------------------------------------------------------------------------------------------------------------------------------------------------------------------------------------------|-------------------------------------------|----------------------------------------------------------------------------------------------------------------------------------------------------|------------------------------------------------------------------------------------------------------------------------------------------------------------|---------------------------------------------------------------------------------------------------------------------------------------------------------------------|
|                                                                                                                  | correlate the findings with GFR and age of the patients.                                                                                       |               | Anuradhapura and Kandy                                                                                                                                                                           |                                           |                                                                                                                                                    |                                                                                                                                                            |                                                                                                                                                                     |
| <b>Wijetunge et al. 2015<sup>29</sup></b><br><b>SL cohort;</b><br><b>n=251</b>                                   | To describe the histological findings in advanced disease and correlate them with the clinical (KDIGO) stages                                  | 2003-2007     | Renal biopsies received by the Department of Pathology, Faculty of Medicine, University of Peradeniya from the Nephrology Units of the Teaching Hospital Kandy and General Hospital Anuradhapura | Retrospective analysis of biopsy samples  | Symptomatic and asymptomatic patients living in endemic areas for > 5years with histologically proven primary interstitial renal disease.          | Interstitial renal disease not secondary to a glomerular disease or systemic disease, no specific primary or secondary glomerular disease, no IMF deposits | Diabetes, long standing hypertension, end stage renal failure                                                                                                       |
| <b>Badurdeen et al. 2016<sup>30</sup></b><br><b>SL cohort;</b><br><b>n=46</b><br><b>(59 recruited for study)</b> | To analyze the clinicopathological profile in patients from CKDu endemic regions presenting with acute symptoms and renal dysfunction.         | Not mentioned | North Central Region                                                                                                                                                                             | Prospective cohort study                  | Previously apparently healthy patients presenting with acute symptoms and having persistently elevated serum creatinine for up to 2 weeks.         |                                                                                                                                                            | Clinically identifiable causes for the renal dysfunction, small-sized kidneys, immune-complexes on IMF, identifiable primary or secondary renal pathology on biopsy |
| <b>Selvarajah et al. 2016<sup>31</sup></b><br><b>SL cohort;</b><br><b>n=125</b>                                  | To link the histopathological features with clinical, epidemiological and laboratory findings to develop a clinicopathological model for CKDu. | 2008-2012     | Teaching Hospital Anuradhapura                                                                                                                                                                   | Prospective study of consecutive patients | Patients fulfilling the criteria developed by the Scientific Committee of the National Research Programme for CKDu (MOH-WER 2009 Vol36:49-REF 106) |                                                                                                                                                            | Diabetes mellitus, chronic or severe hypertension, snake bite, GN, urological diseases, contraindications for biopsy                                                |

|                                                                                                                                  |                                                                                                                                                                                                                                  |               |                                                                            |                                                                                                                                   |                                                                                                                                                                                                                                                                  |                                                                                                                                  |                                                                                                    |
|----------------------------------------------------------------------------------------------------------------------------------|----------------------------------------------------------------------------------------------------------------------------------------------------------------------------------------------------------------------------------|---------------|----------------------------------------------------------------------------|-----------------------------------------------------------------------------------------------------------------------------------|------------------------------------------------------------------------------------------------------------------------------------------------------------------------------------------------------------------------------------------------------------------|----------------------------------------------------------------------------------------------------------------------------------|----------------------------------------------------------------------------------------------------|
| <b>Wijkström et al. 2018</b> <sup>32</sup><br><b>SL cohort;</b><br><b>n=11</b>                                                   | To assess renal pathology of CKDu in Sri Lanka and to compare with MeN                                                                                                                                                           | Not mentioned | General Hospital Polonnaruwa                                               | Prospective study of patients with CKDu undergoing renal biopsy over 1 week                                                       | Patients clinically diagnosed to have CKDu                                                                                                                                                                                                                       | 20-65 years of age and plasma creatinine 100-220 µmol/L or eGFR 30-80ml/min/1.73m <sup>2</sup>                                   | Diabetes mellitus, uncontrolled hypertension, albuminuria >1g/24h, other known renal disease       |
| <b>Anand et al. 2019</b> <sup>33</sup><br><b>SL cohort;</b><br><b>n=87</b><br><i>(Only PTKD group; n=43 were described)</i>      | To identify if routinely measured clinical features are associated with histopathological confirmation of tubulointerstitial kidney disease, particularly for the purpose of patient selection for case-control studies in CKDu. | 2016-2017     | Teaching Hospital, Kandy                                                   | Prospective study on new CKD patients recommended for biopsy and subsequently confirmed as CKDu according to the presence of PTKD | Patients with unexplained abnormal urine sediment or elevated serum creatinine.                                                                                                                                                                                  | IMF predominantly negative. Inflammation and tubulointerstitial change predominant rather than glomerular or vascular pathology. | Small kidneys                                                                                      |
| <b>Vervae et al. 2020</b> <sup>38</sup><br><b>SL cohort;</b><br><b>n=18</b>                                                      | To define the etiology of CINAC                                                                                                                                                                                                  | Not mentioned | SL, ES, India and France                                                   | Study of biopsy material from patients diagnosed with CINAC, MeN, CKDu                                                            | CINAC/MeN/CKDu renal biopsy samples from patients meeting 4 of the 5 following clinico-epidemiologic criteria: patients with CKD living in agricultural environment; living in a CINAC-endemic region; no trace proteinuria; no diabetes; no high blood pressure |                                                                                                                                  |                                                                                                    |
| <b>Nicaragua</b>                                                                                                                 |                                                                                                                                                                                                                                  |               |                                                                            |                                                                                                                                   |                                                                                                                                                                                                                                                                  |                                                                                                                                  |                                                                                                    |
| <b>Wijkström et al. 2017</b> <sup>36</sup><br><b>NGC cohort;</b><br><b>n=19</b><br><i>(only 16 considered as representative)</i> | Replicate study of Wijkström 2013 in a cohort from a different region                                                                                                                                                            | 2014          | Research Center of Health, Work and Environment, National Autonomous, Leon | Prospective study of males with CKDu and a history of sugarcane work who had been to a medical visit during a 12-month period     | Clinically diagnosed men with CKDu who had a history of sugarcane work                                                                                                                                                                                           | Age 20 to 65 years, SCr of 100 to 220 micro mol/L or eGFR of 30 to 80 mL/min/ 1.73 m2.                                           | Proteinuria >3 g/24 h, uncontrolled hypertension, diabetes mellitus or other known kidney disease. |

|                                                                              |                                                                                                                                            |      |                         |                                                                     |                                                                                                                              |                                                                                                                                                                                               |                                                                                                                                                                                                |
|------------------------------------------------------------------------------|--------------------------------------------------------------------------------------------------------------------------------------------|------|-------------------------|---------------------------------------------------------------------|------------------------------------------------------------------------------------------------------------------------------|-----------------------------------------------------------------------------------------------------------------------------------------------------------------------------------------------|------------------------------------------------------------------------------------------------------------------------------------------------------------------------------------------------|
| <b>Fischer et al. 2017<sup>37</sup></b><br><b>NCG cohort;</b><br><b>n=11</b> | To describe the renal pathology in patients at the onset of the disease to facilitate clinical diagnosis and propose a mechanism of injury | 2016 | Chichigalpa, Chinandega | Prospective study on young AKI patients with previously normal SCr. | Patients 18 to 39 years of age with elevated serum creatinine and acute symptoms without any known causes for kidney disease | Elevated SCr (>1.3 mg/dl for males; >1.1 mg/dl for females; $\geq 0.3$ mg/dl or $\geq 1.5$ -fold greater than baseline), leukocyturia ( $\geq 10$ cells/field), and leukocytosis/neutrophilia | Hypertension, diabetes, or heart condition, <2 functional kidneys, blood thinners within 7 days, positive urine culture results, or return to normal SCr after 24 hours of intravenous fluids. |
|------------------------------------------------------------------------------|--------------------------------------------------------------------------------------------------------------------------------------------|------|-------------------------|---------------------------------------------------------------------|------------------------------------------------------------------------------------------------------------------------------|-----------------------------------------------------------------------------------------------------------------------------------------------------------------------------------------------|------------------------------------------------------------------------------------------------------------------------------------------------------------------------------------------------|

### El Salvador

|                                                                                 |                                                                                                                                                                                                                     |               |                                                                                              |                                                                        |                                                                                                                                                                                                                 |                                                                                                       |                                                                                                             |
|---------------------------------------------------------------------------------|---------------------------------------------------------------------------------------------------------------------------------------------------------------------------------------------------------------------|---------------|----------------------------------------------------------------------------------------------|------------------------------------------------------------------------|-----------------------------------------------------------------------------------------------------------------------------------------------------------------------------------------------------------------|-------------------------------------------------------------------------------------------------------|-------------------------------------------------------------------------------------------------------------|
| <b>Wijkström et al. 2013<sup>34</sup></b><br><b>ES cohort;</b><br><b>n=8</b>    | To report clinical features and renal morphology in selected CKDu patients                                                                                                                                          | Not mentioned | Hospital Nacional Rosales, San Salvador, El Salvador                                         | Prospective study on selected patients                                 | Male plantation workers with CKDu and clinical suspicion of MeN.                                                                                                                                                | Age 20-65 years, SCr - 120 to 220 $\mu\text{mol/L}$ or eGFR of 30 to 60 mL/min/ 1.73 m <sup>2</sup> . | Nephrotic range proteinuria (>3.5 g/24h ), uncontrolled hypertension, diabetes                              |
| <b>Lopez-Marin et al. 2014<sup>35</sup></b><br><b>ES cohort;</b><br><b>n=46</b> | To characterize the histopathology, describe renal damage according to disease stage and assess associations between histopathology and socio-demography of CKDu patients from Salvadoran agricultural communities. | 2013          | 11 agricultural communities of 4 regions - Usulután, San Miguel, Ahuachapán and Chalatenango | Prospective descriptive cross-sectional study                          | Clinically diagnosed CKDu patients identified through population screening                                                                                                                                      | CKD stage 2 to 3b                                                                                     | Diabetes mellitus, hypertension, glomerulopathy, polycystic kidney disease, obstructive kidney disease, HIV |
| <b>Vervae et al. 2020<sup>38</sup></b><br><b>ES cohort;</b><br><b>n=11</b>      | To define the etiology of CINAC                                                                                                                                                                                     | Not mentioned | SL, ES, India and France                                                                     | Study of biopsy material from patients diagnosed with CINAC, MeN, CKDu | CINAC/MeN/CKDu renal biopsy samples from patients meeting 4 of the 5 following clinico-epidemiologic criteria: patients with CKD living in agricultural environment; living in a CINAC-endemic region; no trace |                                                                                                       |                                                                                                             |

proteinuria; no diabetes; no high blood pressure

Abbreviations: M:F, Male: Female ratio; SL, Sri Lanka ; ES, El Salvador ; NCG, Nicaragua; CKD, chronic kidney disease; CKDu, chronic kidney disease of uncertain etiology; CINAC, chronic interstitial nephritis in agricultural communities; MeN, Mesoamerican nephropathy; SCr, Serum Creatinine; eGFR, estimated glomerular filtration rate; IMF, Immunofluorescence; AKI, Acute kidney injury; GN, glomerulonephritis; PTKD, Primary tubulointerstitial kidney disease; SLE, Systemic lupus erythematosus; HIV, Human immunodeficiency virus

## Item S2

### PRISMA checklist

| Section/topic             | # | Checklist item                                                                                                                                                                                                                                                                                              | Reported on page # |
|---------------------------|---|-------------------------------------------------------------------------------------------------------------------------------------------------------------------------------------------------------------------------------------------------------------------------------------------------------------|--------------------|
| <b>TITLE</b>              |   |                                                                                                                                                                                                                                                                                                             |                    |
| Title                     | 1 | Identify the report as a systematic review, meta-analysis, or both.                                                                                                                                                                                                                                         | Title page - 1     |
| <b>ABSTRACT</b>           |   |                                                                                                                                                                                                                                                                                                             |                    |
| Structured summary        | 2 | Provide a structured summary including, as applicable: background; objectives; data sources; study eligibility criteria, participants, and interventions; study appraisal and synthesis methods; results; limitations; conclusions and implications of key findings; systematic review registration number. | 2                  |
| <b>INTRODUCTION</b>       |   |                                                                                                                                                                                                                                                                                                             |                    |
| Rationale                 | 3 | Describe the rationale for the review in the context of what is already known.                                                                                                                                                                                                                              | 3,4                |
| Objectives                | 4 | Provide an explicit statement of questions being addressed with reference to participants, interventions, comparisons, outcomes, and study design (PICOS).                                                                                                                                                  | N/A                |
| <b>METHODS</b>            |   |                                                                                                                                                                                                                                                                                                             |                    |
| Protocol and registration | 5 | Indicate if a review protocol exists, if and where it can be accessed (e.g., Web address), and, if available, provide registration information including registration number.                                                                                                                               | N/A                |
| Eligibility criteria      | 6 | Specify study characteristics (e.g., PICOS, length of follow-up) and report characteristics (e.g., years considered, language, publication status) used as criteria for eligibility, giving rationale.                                                                                                      | 5                  |

|                                    |    |                                                                                                                                                                                                                        |     |
|------------------------------------|----|------------------------------------------------------------------------------------------------------------------------------------------------------------------------------------------------------------------------|-----|
| Information sources                | 7  | Describe all information sources (e.g., databases with dates of coverage, contact with study authors to identify additional studies) in the search and date last searched.                                             | 5   |
| Search                             | 8  | Present full electronic search strategy for at least one database, including any limits used, such that it could be repeated.                                                                                          | 5   |
| Study selection                    | 9  | State the process for selecting studies (i.e., screening, eligibility, included in systematic review, and, if applicable, included in the meta-analysis).                                                              | 5   |
| Data collection process            | 10 | Describe method of data extraction from reports (e.g., piloted forms, independently, in duplicate) and any processes for obtaining and confirming data from investigators.                                             | 5   |
| Data items                         | 11 | List and define all variables for which data were sought (e.g., PICOS, funding sources) and any assumptions and simplifications made.                                                                                  | 5   |
| Risk of bias in individual studies | 12 | Describe methods used for assessing risk of bias of individual studies (including specification of whether this was done at the study or outcome level), and how this information is to be used in any data synthesis. | N/A |
| Summary measures                   | 13 | State the principal summary measures (e.g., risk ratio, difference in means).                                                                                                                                          | N/A |
| Synthesis of results               | 14 | Describe the methods of handling data and combining results of studies, if done, including measures of consistency (e.g., $I^2$ ) for each meta-analysis.                                                              | N/A |

| Section/topic                 | #  | Checklist item                                                                                                                                                                                           | Reported on page # |
|-------------------------------|----|----------------------------------------------------------------------------------------------------------------------------------------------------------------------------------------------------------|--------------------|
| Risk of bias across studies   | 15 | Specify any assessment of risk of bias that may affect the cumulative evidence (e.g., publication bias, selective reporting within studies).                                                             | N/A                |
| Additional analyses           | 16 | Describe methods of additional analyses (e.g., sensitivity or subgroup analyses, meta-regression), if done, indicating which were pre-specified.                                                         | N/A                |
| <b>RESULTS</b>                |    |                                                                                                                                                                                                          |                    |
| Study selection               | 17 | Give numbers of studies screened, assessed for eligibility, and included in the review, with reasons for exclusions at each stage, ideally with a flow diagram.                                          | 6                  |
| Study characteristics         | 18 | For each study, present characteristics for which data were extracted (e.g., study size, PICOS, follow-up period) and provide the citations.                                                             | 6-8                |
| Risk of bias within studies   | 19 | Present data on risk of bias of each study and, if available, any outcome level assessment (see item 12).                                                                                                | N/A                |
| Results of individual studies | 20 | For all outcomes considered (benefits or harms), present, for each study: (a) simple summary data for each intervention group (b) effect estimates and confidence intervals, ideally with a forest plot. | N/A                |
| Synthesis of results          | 21 | Present results of each meta-analysis done, including confidence intervals and measures of consistency.                                                                                                  | N/A                |
| Risk of bias across studies   | 22 | Present results of any assessment of risk of bias across studies (see Item 15).                                                                                                                          | N/A                |
| Additional analysis           | 23 | Give results of additional analyses, if done (e.g., sensitivity or subgroup analyses, meta-regression [see Item 16]).                                                                                    | N/A                |
| <b>DISCUSSION</b>             |    |                                                                                                                                                                                                          |                    |

|                     |    |                                                                                                                                                                                      |                              |
|---------------------|----|--------------------------------------------------------------------------------------------------------------------------------------------------------------------------------------|------------------------------|
| Summary of evidence | 24 | Summarize the main findings including the strength of evidence for each main outcome; consider their relevance to key groups (e.g., healthcare providers, users, and policy makers). | 8-13;<br>Table 1;<br>Table 2 |
| Limitations         | 25 | Discuss limitations at study and outcome level (e.g., risk of bias), and at review-level (e.g., incomplete retrieval of identified research, reporting bias).                        | 18-20                        |
| Conclusions         | 26 | Provide a general interpretation of the results in the context of other evidence, and implications for future research.                                                              | 20-22                        |
| <b>FUNDING</b>      |    |                                                                                                                                                                                      |                              |
| Funding             | 27 | Describe sources of funding for the systematic review and other support (e.g., supply of data); role of funders for the systematic review.                                           | 23                           |
